# Supplementary material for: The Δ40p53 isoform inhibits p53-dependent eRNA transcription and enables regulation by signal-specific transcription factors during p53 activation
Source: PLoS Biol. 2021 Aug 5;19(8):e3001364. doi: 10.1371/journal.pbio.3001364 (PMC8370613; doi:10.1371/journal.pbio.3001364)
Supplement: S15 Data — Associated with S16 Fig. File contains tabs with labels corresponding to relevant panel. (XLSX) [file pbio.3001364.s041.xlsx]

## Sheet: S16B- shp63 Proliferation Assay
Corrected Absolute Cell Count	Day 1	Day 3	Day 6	Day 9	Day 12	Day 18	Day 21			Ratio Nutlin/DMSO	Day 1	Day 3	Day 6	Day 9	Day 12	Day 18	Day 21
WTp53 DMSO	1000000	2352000	1696000	2576000	2680000	10720000	3760000			WTp53	1	0.554422	0.622642	0.118323	0.0525373	9.3284e-08	2.6596e-07
WTp53 Nutlin	1000000	1304000	1056000	304800	140800	1	1			WTp53 p63sh	1	0.495238	0.349071	0.164835	0.0832	2.2321e-07	2.4802e-07
WTp53 p63sh DMSO	1000000	2520000	2152000	1456000	2000000	4480000	4032000			WTp53:WTp53	1	0.774545	0.210902	0.0570248	0.156373	7.1839e-08	2.4606e-07
WTp53 p63sh Nutlin	1000000	1248000	751200	240000	166400	1	1			WTp53:WTp53 p63sh	1	0.884956	0.303571	0.182938	0.0462366	4.417e-08	2.6427e-07
WTp53:WTp53 DMSO	1000000	4400000	2128000	2904000	3264000	13920000	4064000			∆40p53:WTp53	1	1.20155	0.799555	0.699187	0.719178	0.644805	0.507273
WTp53:WTp53 Nutlin	1000000	3408000	448800	165600	510400	1	1			∆40p53:WTp53 p63sh	1	1.45631	0.918269	0.807407	0.394161	0.48871	0.365482
WTp53:WTp53 p63sh DMSO	1000000	1808000	2016000	1688000	2232000	22640000	3784000
WTp53:WTp53 p63sh Nutlin	1000000	1600000	612000	308800	103200	1	1
∆40p53:WTp53 DMSO	1000000	5160000	3592000	2952000	2336000	12320000	13200000
∆40p53:WTp53 Nutlin	1000000	6200000	2872000	2064000	1680000	7944000	6696000
∆40p53:WTp53 p63sh DMSO	1000000	3296000	1664000	1080000	2192000	14880000	3152000
∆40p53:WTp53 p63sh Nutlin	1000000	4800000	1528000	872000	864000	7272000	1152000
		Split this 1:10	Split this 1:10	Split this 1:10	Split this 1:10	Split this 1:10

## Sheet: S16D- shp63 qPCR
Target	Sample Name	Cells	Treatments	2^-(∆∆CT) Rep1	2^-(∆∆CT) Rep 2	Average	stderr
p21	WTp53 DMSO	WTp53	DMSO	0.613361	0.515936	0.564649	0.0487125
p21	WTp53 Nutlin	WTp53	Nutlin	11.2328	16.8066	14.0197	2.78692
p21	WTp53 sh63 DMSO	WTp53	sh63 DMSO	0.994961	1.05194	1.02345	0.0284904
p21	WTp53 sh63 Nutlin	WTp53	sh63 Nutlin	10.5218	22.8836	16.7027	6.18092
p21	WTp53:WTp53 DMSO	WTp53:WTp53	DMSO	2.67291	1.12022	1.89656	0.776342
p21	WTp53:WTp53 Nutlin	WTp53:WTp53	Nutlin	3.61571	14.8772	9.24648	5.63076
p21	WTp53:WTp53 sh63 DMSO	WTp53:WTp53	sh63 DMSO	0.948831	2.05564	1.50223	0.553403
p21	WTp53:WTp53 sh63 Nutlin	WTp53:WTp53	sh63 Nutlin	10.8377	11.67	11.2539	0.416146
p21	∆40p53:WTp53 DMSO	∆40p53:WTp53	DMSO	0.599726	0.831314	0.71552	0.115794
p21	∆40p53:WTp53 Nutlin	∆40p53:WTp53	Nutlin	2.6375	1.22345	1.93048	0.707026
p21	∆40p53:WTp53 sh63 DMSO	∆40p53:WTp53	sh63 DMSO	1.07734	0.962491	1.01991	0.0574237
p21	∆40p53:WTp53 sh63 Nutlin	∆40p53:WTp53	sh63 Nutlin	1.7977	3.40458	2.60114	0.803437
puma	WTp53 DMSO	WTp53	DMSO	0.495589	0.881594	0.688591	0.193003
puma	WTp53 Nutlin	WTp53	Nutlin	6.69303	8.59959	7.64631	0.953278
puma	WTp53 sh63 DMSO	WTp53	sh63 DMSO	1.08888	1.24862	1.16875	0.0798705
puma	WTp53 sh63 Nutlin	WTp53	sh63 Nutlin	3.89425	21.0073	12.4508	8.55654
puma	WTp53:WTp53 DMSO	WTp53:WTp53	DMSO	0.734776	1.12998	0.932377	0.1976
puma	WTp53:WTp53 Nutlin	WTp53:WTp53	Nutlin	2.8223	3.39325	3.10778	0.285475
puma	WTp53:WTp53 sh63 DMSO	WTp53:WTp53	sh63 DMSO	1.22181	0.914412	1.06811	0.153697
puma	WTp53:WTp53 sh63 Nutlin	WTp53:WTp53	sh63 Nutlin	4.06187	2.99797	3.52992	0.53195
puma	∆40p53:WTp53 DMSO	∆40p53:WTp53	DMSO	1.05871	1.07384	1.06628	0.00756321
puma	∆40p53:WTp53 Nutlin	∆40p53:WTp53	Nutlin	3.87591	2.346	3.11096	0.764955
puma	∆40p53:WTp53 sh63 DMSO	∆40p53:WTp53	sh63 DMSO	1.54546	0.901594	1.22353	0.321934
puma	∆40p53:WTp53 sh63 Nutlin	∆40p53:WTp53	sh63 Nutlin	1.77843	2.07647	1.92745	0.149023
shp63 Experiments: WTp53 at p21	pval	shp63 Experiments: WTp53:WTp53 at p21	pval	shp63 Experiments: ∆40p53:WTp53 at p21	pval		DMSO vs DMSO at p21	pval
DMSO vs Nutlin	0.0201683	DMSO vs Nutlin	0.162603	DMSO vs Nutlin	0.116005		WTp53 vs WTp53:WTp53	0.11449
DMSO shp63 vs Nutlin shp63	0.0632829	DMSO shp63 vs Nutlin shp63	0.00250192	DMSO shp63 vs Nutlin shp63	0.0943118		WTp53 vs ∆40p53:WTp53	0.176348
DMSO vs DMSO shp63	0.00739697	DMSO vs DMSO shp63	0.359647	DMSO vs DMSO shp63	0.0713474		WTp53:WTp53 vs ∆40p53:WTp53	0.135667
Nutlin vs Nutlin shp63	0.365267	Nutlin vs Nutlin shp63	0.378093	Nutlin vs Nutlin shp63	0.29744
shp63 Experiments: WTp53 at PUMA	pval	shp63 Experiments: WTp53:WTp53 at PUMA	pval	shp63 Experiments: ∆40p53:WTp53 at PUMA	pval		DMSO vs DMSO at PUMA	pval
DMSO vs Nutlin	0.00949325	DMSO vs Nutlin	0.012269	DMSO vs Nutlin	0.058051		WTp53 vs WTp53:WTp53	0.235281
DMSO shp63 vs Nutlin shp63	0.159043	DMSO shp63 vs Nutlin shp63	0.0235237	DMSO shp63 vs Nutlin shp63	0.0928308		WTp53 vs ∆40p53:WTp53	0.0948564
DMSO vs DMSO shp63	0.074137	DMSO vs DMSO shp63	0.321009	DMSO vs DMSO shp63	0.336806		WTp53:WTp53 vs ∆40p53:WTp53	0.284074
Nutlin vs Nutlin shp63	0.316473	Nutlin vs Nutlin shp63	0.27839	Nutlin vs Nutlin shp63	0.134093
